# Supplementary material
Source: PubMed Central journal article supplement (PMC6048524)
Supplement: pnas.1803723115.sapp.pdf [file pnas.1803723115.sapp.pdf]

1 **Supplementary Information for:**

2 **Ionophoric effects of the antitubercular drug bedaquiline**

3 Kiel Hards<sup>a</sup>, Duncan G. G. McMillan<sup>b</sup>, Lici A. Schurig-Briccio<sup>c</sup>, Robert B. Gennis<sup>c</sup>, Holger Lill<sup>d</sup>,  
4 Dirk Bald<sup>d</sup>, Gregory M. Cook<sup>a,e\*</sup>

5  
6 <sup>a</sup>Department of Microbiology and Immunology, School of Biomedical Sciences, University of Otago,  
7 Dunedin 9054, New Zealand

8 <sup>b</sup>Department of Biotechnology, Delft University of Technology, 2629 HZ Delft, The Netherlands

9 <sup>c</sup>Department of Biochemistry, University of Illinois at Urbana-Champaign, Urbana, Illinois 61801, United  
10 States

11 <sup>d</sup>Department of Molecular Cell Biology, Amsterdam Institute for Molecules, Medicines and Systems, VU  
12 University Amsterdam, De Boelelaan 1085, 1081 HV Amsterdam, The Netherlands

13 <sup>e</sup>Maurice Wilkins Centre for Molecular Biodiscovery, The University of Auckland, Private Bag 92019,  
14 Auckland 1042, New Zealand

15

16 \*To whom correspondence should be addressed. Email: [gregory.cook@otago.ac.nz](mailto:gregory.cook@otago.ac.nz)

17

## 1 **Supporting Materials and Methods**

### 2 **Bacterial strains, media and growth conditions.**

3 In this study, either *E. coli* MG1655 (*E. coli* Genetic Stock Center (CGSC 6300); wild-type),  
4 C41(DE3) with a markerless inframe deletion in the *unc* operon ((1); C41  $\Delta atp$ ), C41  $\Delta atp$  + the  
5 previously described his-tagged F<sub>1</sub>F<sub>o</sub> expression plasmid pBWU13 ((2); C41  $\Delta atp$  pBWU $\beta$ His)  
6 or DK8  $\Delta atp$  pBWU13 (3) were used as indicated. Strains were grown in LB medium or on LB  
7 agar (1.5 % agar) for all experiments. All bacterial growth was performed at 37 °C with agitation  
8 (200 rpm). All inoculations were performed from overnight cultures to a final optical density at  
9 600 nm (OD<sub>600</sub>) = 0.005. BDQ was a kind gift of Dr. Koen Andries, Janssen Pharmaceutical  
10 Research & Development. All BDQ stocks were prepared in filter sterilized DMSO.

11

### 12 **Determination of cell growth inhibition.**

13 The minimum inhibitory concentration (MIC) is defined here as the lowest concentration with no  
14 visual growth after 24 hours of growth in 200  $\mu$ L LB media in a flat bottom 96 well-plate. The  
15 final DMSO concentration in all wells was 1%.

16

### 17 **Preparation of inverted membrane vesicles (IMVs)**

18 *E. coli* strains were grown in 2 L conical flasks, containing 1 L of media, overnight at 37 °C.  
19 Approximately 5 g wet weight of cells were collected by centrifugation (30 min, 8000  $\times g$ ) and  
20 resuspended in 50 mL of buffer A (50 mM Tris-HCl, pH 7.5, 5 mM MgCl<sub>2</sub>, 1 mM DTT, 1 Roche  
21 cComplete™ mini protease inhibitor tablet per 50 mL, 1 mg DNase per 50 mL). Cells were  
22 disrupted by two passages through a Stansted Fluid Power French pressure cell at 10,000 psi.  
23 Cell debris was removed by discarding the pellet after centrifugation (10 min, 15,000  $\times g$ ). The  
24 supernatant was centrifuged (45 min, 200,000  $\times g$ ) to collect IMVs. The membrane pellets were  
25 resuspended to a protein concentration of 25 mg mL<sup>-1</sup> in buffer A + 10% glycerol and stored in  
26 aliquots at -80 °C until required.

27

### 28 **ATP synthesis and hydrolysis assays in IMVs**

29 End-point ATP synthesis measurements were performed using the Glucose-6-phosphate  
30 dehydrogenase method (G6PDH) (4). A proton motive force was set-up by addition of NADH  
31 and the produced ATP was quantified with hexokinase/G6PDH. All samples contained 0.2 mg

1 mL<sup>-1</sup> membrane protein in MOPS buffer (50mM MOPS, 2mM MgCl<sub>2</sub>, pH 7.5) including  
2 protease inhibitors (Roche, EDTA free, 1 tablet per 50 ml), 11.8 U mL<sup>-1</sup> hexokinase, 100 μM  
3 diadenosine pentaphosphate (Ap5a), 2 mM ADP, 25.4 mM glucose and 20 mM KH<sub>2</sub>PO<sub>4</sub>.  
4 Samples containing BDQ or DCCD were preincubated 15 minutes at room temperature before  
5 the start of the reaction. All reactions were initiated with 5 mM NADH (final concentration) and  
6 incubated at 37 °C, with agitation at 300 rpm, for 20 minutes. Afterwards, reactions were  
7 arrested with 25 mM EDTA (final concentration) and transferred to ice. Samples were boiled for  
8 5 minutes and centrifuged in a bench-top Eppendorf centrifuge at 10000 rpm for 20 minutes.  
9 Samples were 6.5-fold diluted in MOPS buffer containing 2.5 mM NADP<sup>+</sup>. Samples containing  
10 50 μM, 100 μM and 200 μM BDQ were diluted two times before measuring. G6PDH (1.6 U mL<sup>-1</sup>)  
11 was added and formation of NADPH was recorded at 340 nm.

12  
13 To determine ATP hydrolysis activity, the production of inorganic phosphate was measured. All  
14 samples contained 0.2 mg mL<sup>-1</sup> membrane protein and were incubated in MOPS buffer with 2  
15 mM ATP for 10 minutes at 37 °C. Samples containing BDQ or DCCD were preincubated for 15  
16 minutes at room temperature. After 10 minutes all samples were immediately transferred to ice-  
17 cold water and centrifuged at 4 °C 10000 rpm for 10 minutes. AMES solution (1 mL, 0.4%  
18 ammonium molybdate in 0.5 M H<sub>2</sub>SO<sub>4</sub> mixed with 10% sodium ascorbate at a 6:1 v/v ratio) was  
19 added to 100 μL supernatant. After 15 minutes of incubation at room temperature, phosphate  
20 production was measured at 820 nm with a spectrophotometer.

21  
22 Real time ATP synthesis measurements were performed in an Oroboros O2k fluorespirometer  
23 using the luciferase method (5). The fluorescent sensors were modified to measure luminescence  
24 by removed the light-filters, turning off the LEDs (setting intensity to 0) and increasing the gain  
25 to 1000. ATP concentrations were calculated from a standard curve performed prior to the  
26 experiment, although boluses of ATP (100 nM) were routinely added at the end of each  
27 experiment to check the integrity of the calibrations. Each assay used 0.125 mg mL<sup>-1</sup> IMVs. The  
28 buffer was 20 mM HEPES-NaOH (pH 7.0), 100 mM K-Acetate, 10 mM Na<sub>2</sub>HPO<sub>4</sub>, 5 mM Mg-  
29 Acetate, 80 μg mL<sup>-1</sup> luciferase (Sigma), 400 μM luciferin (Thermo), 200 μM Ap5A (Sigma).  
30 This concentration of luciferase did not significantly affect the O<sub>2</sub> concentration in the chamber.

31

1 **Purification of *E. coli* F<sub>1</sub>F<sub>0</sub> and reconstitution into proteoliposomes**

2 The F<sub>1</sub>F<sub>0</sub> ATP synthase was extracted and purified from IMVs of C41  $\Delta atp$  pBWU $\beta$ His  
3 according to published protocols (6). IMVs resulting from the lysis of 5 g wet weight of cells  
4 were resuspended in 10 mL extraction buffer (50 mM Tris-HCl pH 7.5, 100 mM KCl, 250 mM  
5 sucrose, 5 mM MgCl<sub>2</sub>, 0.1 mM K<sub>2</sub>-EDTA, 0.2 mM DTT, 0.8% soybean phosphatidylcholine,  
6 1.5% octylglucopyranoside, 0.5% sodium deoxycholate, 0.5% sodium cholate, 2.5% glycerol, 30  
7 mM imidazole, 1 Roche cOmplete™ mini protease inhibitor tablet per 50 mL) and incubated at 4  
8 °C for 1 h with agitation. Insoluble material was removed by discarding the pellet after  
9 centrifugation (45 min, 200,000 × g). The supernatant was loaded on a HisTrap HP Ni-NTA  
10 column (GE Healthcare Life Sciences), washed with 10 volumes of extraction buffer and  
11 subsequently eluted with extraction buffer containing 400 mM imidazole. Reconstitution was  
12 performed immediately according to published protocols (6), with modifications. Prior to  
13 purification of F<sub>1</sub>F<sub>0</sub>, a 30 mg mL<sup>-1</sup> solution of soybean phosphatidylcholine (Sigma, Type II-S) in  
14 buffer (10 mM HEPES-NaOH, pH 7.5, 5 mM MgCl<sub>2</sub>, 100 mM KCl) was sonicated 3 x 30 s in  
15 an ice-water bath using a Sonics VibraCell (VCX-750) set to 40% amplitude. Liposomes were  
16 incubated with the purified protein and 1% sodium cholate at a 1:100 protein:lipid ratio for 30  
17 min at room temperature. Cholate was removed using a PD-10 desalting column (GE Healthcare  
18 Life Sciences) and F<sub>1</sub>F<sub>0</sub> proteoliposomes were collected by centrifugation (30 min, 200,000 × g).  
19 This protocol has been previously demonstrated to give unilamellar liposomes with  
20 unidirectionally incorporated protein (6). Glycerol was added to 10% (final concentration) then  
21 aliquots were frozen in a dry ice-ethanol bath and stored at -80 °C until required.

22

23 **Purification of *E. coli* cytochrome *bo*<sub>3</sub> and reconstitution into proteoliposomes**

24 Cytochrome *bo*<sub>3</sub> (*cbo*<sub>3</sub>) was extracted and purified from inner membranes in a method similar to  
25 that of Rumbley *et al* 1997 (7). *E. coli* inner membranes were prepared from strain  
26 GO105/pJRhisA (7) in which *cbo*<sub>3</sub> is overexpressed. *E. coli* was aerobically grown to mid-log  
27 phase at 37 °C in LB medium supplemented with 500 μM CuSO<sub>4</sub> and 100 μg mL<sup>-1</sup> carbenicillin.  
28 Cells were harvested by centrifugation at 10,000 × g for 10 min and the pellet washed and  
29 repelleted twice with buffer B (20 mM MOPS, 30 mM Na<sub>2</sub>SO<sub>4</sub>, pH 7.4). Cells were then  
30 resuspended in buffer B containing 1 Roche cOmplete™ mini protease inhibitor tablet per 50 mL,  
31 0.1 mM phenylmethylsulfonyl fluoride, 0.1 mg pancreatic DNase per mL, and lysed by two

1 passages through a French press at 20,000 psi. Any debris and unbroken cells were removed by  
2 centrifugation at  $10,000 \times g$  for 30 min. The supernatant was then ultracentrifuged ( $200,000 \times g$ ,  
3 45 min,  $4^{\circ}\text{C}$ ) and the membrane pellet resuspended in buffer C (20 mM MOPS, 30 mM  $\text{Na}_2\text{SO}_4$ ,  
4 25% w/w sucrose, pH 7.4). This was applied to the top of a 30% w/w to 55% w/w sucrose  
5 gradient and ultracentrifugation ( $130,000 \times g$ , 16 h,  $4^{\circ}\text{C}$ ) with no deceleration or breaking to  
6 separate inner membrane from outer membrane. The inner membrane fraction was removed from  
7 the sucrose gradient and washed 3 times with buffer B by ultracentrifugation ( $200,000 \times g$ , 45  
8 min,  $4^{\circ}\text{C}$ ). Inner membranes were then resuspended in buffer B and either used immediately for  
9 purification or stored in aliquots at  $-80^{\circ}\text{C}$  until use. To extract *cbo*<sub>3</sub>, inner membrane vesicles  
10 were diluted to 5 mg of protein mL in solubilization buffer (20 mM Tris HCl, pH 8.0, 5 mM  
11  $\text{MgSO}_4$ , 10% glycerol, 0.5% Lauryl Maltose Neopentyl Glycol (LMNG), 300 mM NaCl, 10 mM  
12 imidazole) and incubated at  $30^{\circ}\text{C}$  for 30 min with gentle inversion every 5 min. The  
13 unsolubilized material was removed by ultracentrifugation ( $200,000 \times g$ , 45 min,  $4^{\circ}\text{C}$ ), and the  
14 supernatant was applied to a Nickel-Sepharose High Performance (GE Healthcare) column that  
15 was previously washed with water and equilibrated with IMAC buffer (50 mM Tris HCl, pH 8.0,  
16 5 mM  $\text{MgSO}_4$ , 10% glycerol, 0.005% Lauryl Maltose Neopentyl Glycol (LMNG), 300 mM  
17 NaCl) containing 10 mM imidazole. To remove contaminating proteins, the resin was washed  
18 with IMAC buffer containing 30 mM imidazole and 150 mM NaCl, and *cbo*<sub>3</sub> was eluted with  
19 IMAC buffer containing with 200 mM imidazole, 150 mM NaCl, and 20% glycerol. The red  
20 *cbo*<sub>3</sub> containing fractions were pooled and concentrated to  $6.57 \text{ mg mL}^{-1}$  using an Amicon Ultra  
21 centrifugal filter devices (molecular weight cutoff ((MWCO), 100,000). Purified *cbo*<sub>3</sub> was either  
22 used immediately for reconstitution or stored in aliquots at  $-80^{\circ}\text{C}$  until use. On the day of  
23 reconstitution of *cbo*<sub>3</sub>, a  $5 \text{ mg mL}^{-1}$  solution of *E. coli* polar lipids (Avanti Polar Lipids) in  
24 reconstitution buffer (20 mM MOPS, pH 7.4, 30 mM  $\text{Na}_2\text{SO}_4$ , 100 mM KCl) was extruded 13  
25 times through a  $400 \mu\text{M}$  polycarbonate membrane. Liposomes were then incubated with the  
26 purified protein for 50 min at  $25^{\circ}\text{C}$  with continuous inversion.

27

### 28 **Fluorescence quenching of cytochrome *bo*<sub>3</sub> proteoliposomes**

29 IMVs (0.2 mg) consisting of 2% *cbo*<sub>3</sub>/mass *E. coli* polar lipids doped with 1% mass ubiquinone-  
30 10 (UQ<sub>10</sub>) per ml were pre-warmed to  $37^{\circ}\text{C}$  for 15 min in 20 mM MOPS, 30 mM  $\text{Na}_2\text{SO}_4$ , pH  
31 7.4, 1 mM DTT, and  $1 \mu\text{M}$  ACMA  $\pm$   $1 \mu\text{M}$  valinomycin with vigorous stirring (800 rpm).

1 Quenching was initiated by the addition of 2.5  $\mu\text{M}$  ubiquinone-0 ( $\text{UQ}_0$ ) in ethanol and reversed  
2 as indicated in text. Ethanol controls had no effect on ACMA quenching.

3

#### 4 **Preparation of pyranine-containing liposomes**

5 Pyranine-containing liposomes were prepared analogous to the method previously described for  
6 analysis of the  $\text{F}_o$  proton transport assays (6).  $\text{F}_1\text{F}_o$  proteoliposomes were stripped of the  $\text{F}_1$   
7 subunit by dialyzing overnight against 1000-fold volume of stripping buffer (0.5 mM Tricine-  
8 NaOH, pH 8.5, 0.5 mM  $\text{Na}_2$ -EDTA) at 4  $^\circ\text{C}$ , diluted 2-fold with stripping buffer and  $\text{F}_o$   
9 liposomes were collected by centrifugation (30 min,  $200,000 \times g$ ). The liposomes were  
10 resuspended to the original volume in incorporation buffer (2 mM MOPS-NaOH, pH 7.5, 5 mM  
11  $\text{MgCl}_2$ , either 50 mM NaCl, 50 mM KCl, 50 mM  $\text{Na}_2\text{SO}_4$  or 50 mM  $\text{K}_2\text{SO}_4$  as indicated in text).  
12 Where specified MOPS was replaced with 2 mM MES-MOPS-Tris to avoid the introduction of  
13 undesired cations when adjusting the buffer pH. Pyranine (Sigma) was added to 1 mM final  
14 concentration and the suspension was snap frozen in a dry ice-ethanol bath, thawed in cold water  
15 and sonicated in a sonicating water bath (3 x 30 s) at room temperature. The freeze-thaw-  
16 sonicate procedure was repeated once more. Unincorporated pyranine was removed using a PD-  
17 10 desalting column (GE Healthcare), equilibrated with incorporation buffer. Eluted liposomes  
18 were collected by centrifugation (30 min,  $200,000 \times g$ ) and the fluorescent pellet was  
19 resuspended to  $\sim 120 \text{ mg mL}^{-1}$ . For protein-free liposomes, soybean phosphatidylcholine was  
20 dissolved at  $30 \text{ mg mL}^{-1}$  in incorporation buffer and sonicated  $3 \times 30 \text{ s}$  on ice using a Vibra-Cell  
21 (VCX 500) set to 40% amplitude, then pyranine incorporation was performed as above. When  $\text{F}_o$   
22 and empty liposomes were compared, empty liposomes were treated exactly the same as  $\text{F}_1\text{F}_o$   
23 preparations (cholate insertion, dialysis etc.), except buffer was added instead of protein solution.  
24 Pyranine-containing liposomes were labeled according to the salt included in the incorporation  
25 buffer and used within 2 days with storage at 4  $^\circ\text{C}$ .

26

#### 27 **Analytical methods**

28 SDS PAGE was performed as described (8), using a PageRuler™ Prestained protein ladder as a  
29 molecular weight standard. Gels were either stained with Coomassie Brilliant Blue G-250  
30 (Sigma-Aldrich), silver staining (9) or transferred onto PVDF transfer membrane (Thermo) and  
31 western blotted using Abcam Anti-6xHis HRP linked antibodies. Chemiluminescence was

1 visualized using an Odyssey Fc gel imager after treatment with a Super Signal® West Pico kit  
2 (Thermo). Protein concentration was enumerated by the BCA assay (Pierce), or DC-Bradford  
3 (Thermo) where necessary, according to a BSA standard.

4

5

6

1

**Table S1. Relationship of pH to fluorescence ratio ( $R_{405/460}$ ) with different salts**

| <b>Salt<sup>1</sup></b>                   | <b>Best-fit relationship</b>                  | <b>n</b> | <b>r<sup>2</sup></b> |
|-------------------------------------------|-----------------------------------------------|----------|----------------------|
| <b>50 mM K<sub>2</sub>SO<sub>4</sub></b>  | pH = 7.205 – 0.469ln( $R_{405/460}$ – 0.2796) | 7        | 1.0000               |
| <b>50 mM Na<sub>2</sub>SO<sub>4</sub></b> | pH = 7.460 – 0.454ln( $R_{405/460}$ – 0.2864) | 7        | 1.0000               |
| <b>50 mM NaCl</b>                         | pH = 7.516 – 0.511ln( $R_{405/460}$ – 0.3572) | 24       | 0.9993               |
| <b>50 mM KCl</b>                          | pH = 7.243 – 0.370ln( $R_{405/460}$ – 0.7335) | 15       | 0.9996               |
| <b>10 mM KCl</b>                          | pH = 7.412 – 0.446ln( $R_{405/460}$ – 0.1857) | 24       | 0.9999               |
| <b>100 mM KCl</b>                         | pH = 7.174 – 0.433ln( $R_{405/460}$ – 0.2489) | 24       | 0.9998               |
| <b>10 mM LiCl</b>                         | pH = 6.536 – 0.431ln( $R_{405/460}$ – 0.8745) | 24       | 0.9916               |
| <b>10 mM NaCl</b>                         | pH = 6.528 – 0.424ln( $R_{405/460}$ – 0.8917) | 24       | 0.9973               |

2 <sup>1</sup>Incorporation buffer (2 mM MOPS-NaOH, 5 mM MgCl<sub>2</sub>) with 50 mM of the indicated salt was  
3 used.

4

5

6

7

8



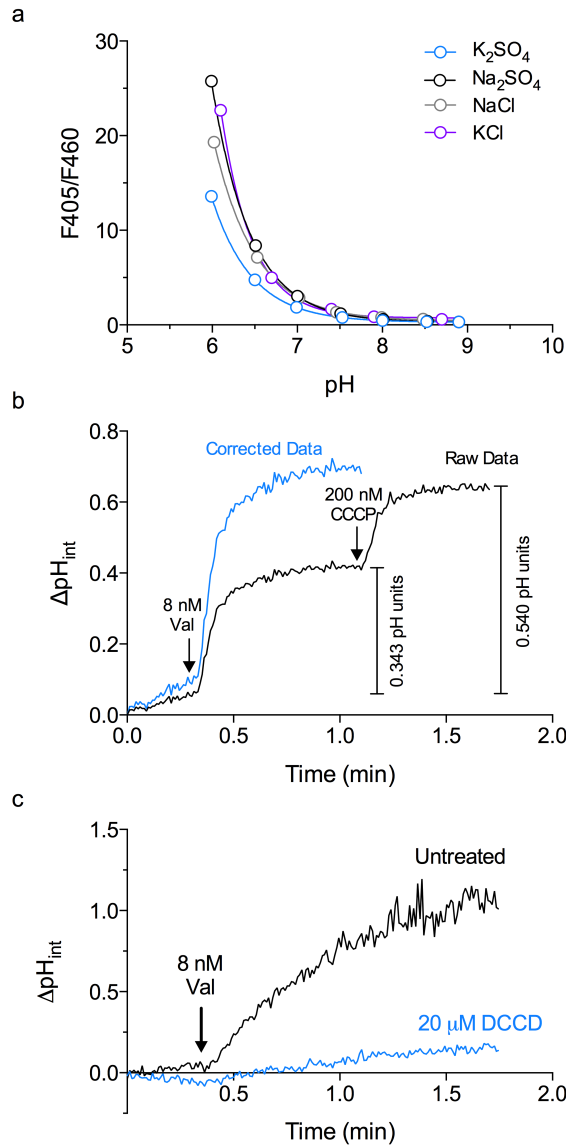

1

2 **Fig. S1. Pyranine calibration and proton transport through  $F_0$ .**

3 A) Standard curve of pyranine fluorescence vs. pH for various incorporation (2 mM MOPS, 5  
 4 mM  $MgCl_2$ ) buffers used in pyranine transport experiments (differing by containing 50 mM of  
 5 the indicated salt). Pyranine (20 nM) was added and the fluorescence ratio measured. Detailed  
 6 data are given in Table 1. B) Proton transport, dependent on  $F_0$ , was initiated by an inwards

7  $K^+$ /Val diffusion potential (50 mM  $K_2SO_4$  in the external 2 mM MOPS buffer, 50 mM  $Na_2SO_4$   
 8 inside). The proportion of  $F_0$  empty proteoliposomes is calculated by the ratio of this activity and

9 that elicited by carbonyl cyanide 3-chlorophenylhydrazone (CCCP). Multiplication of the data  
 10 accounts for empty liposomes. C) Proton transport was initiated in an analogous experiment to

- 1 B), where indicated  $F_o$  proteoliposomes were pre-incubated with N,N'-dicyclohexylcarbodiimide
- 2 (DCCD) for 10 minutes.
- 3

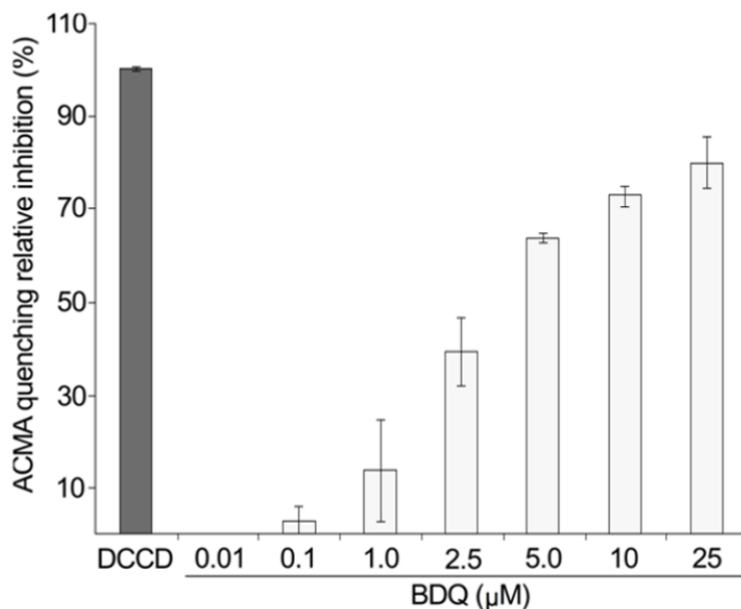

1  
 2 **Fig. S2. Inhibition of ACMA quenching by BDQ in *E. coli* IMVs.** ATP (1 mM) was added to  
 3 initiate ACMA quenching, after 0.3 mM SF6847 was added to uncouple the membrane and  
 4 restore fluorescence. The rate of quenching was calculated relative to sample without added  
 5 ATP. End-point measurements were taken as described in the materials and methods.

6  
 7

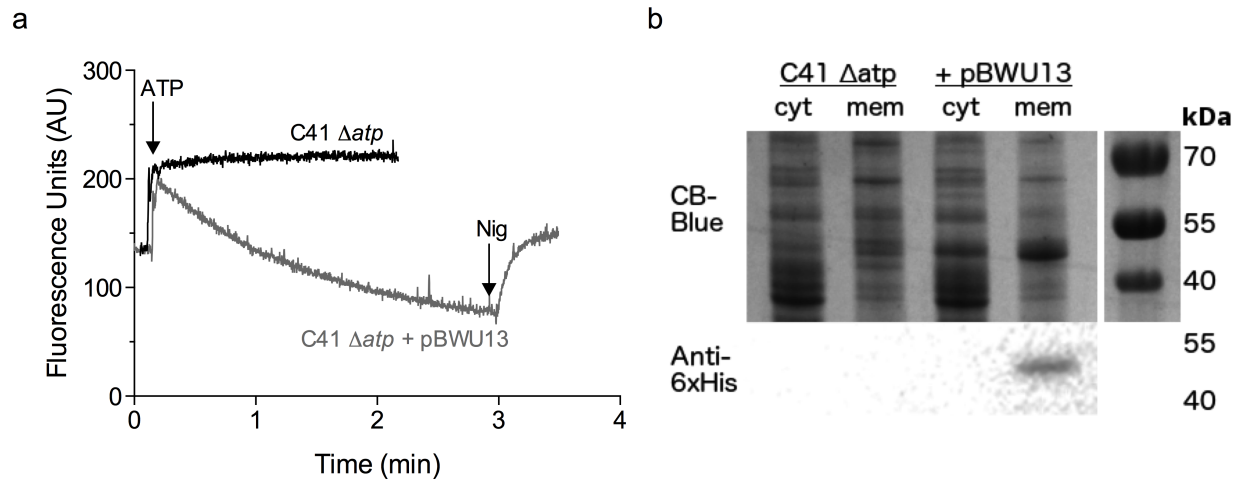

1  
2 **Fig. S3. Expression of  $F_1F_0$  in *E. coli* membrane vesicles.** A) Proton pumping was elicited by  
3 ATP hydrolysis (0.5 mM ATP) and the proton gradient then collapsed by 1  $\mu$ M nigericin (Nig)  
4 where indicated. Acridine orange buffer (10 mM HEPES pH 7.5, 100 mM KCl, 5 mM  $MgCl_2$ )  
5 was used. B) Coomassie SDS-PAGE (12.5%) or anti-6 $\times$ His western confirms the expression of  
6  $F_1F_0$  by detection of the his-tagged  $\beta$ -subunit (~50 kDa). Protein (20  $\mu$ g) was loaded in each lane.  
7 cyt: cytosol, mem: membrane.  
8

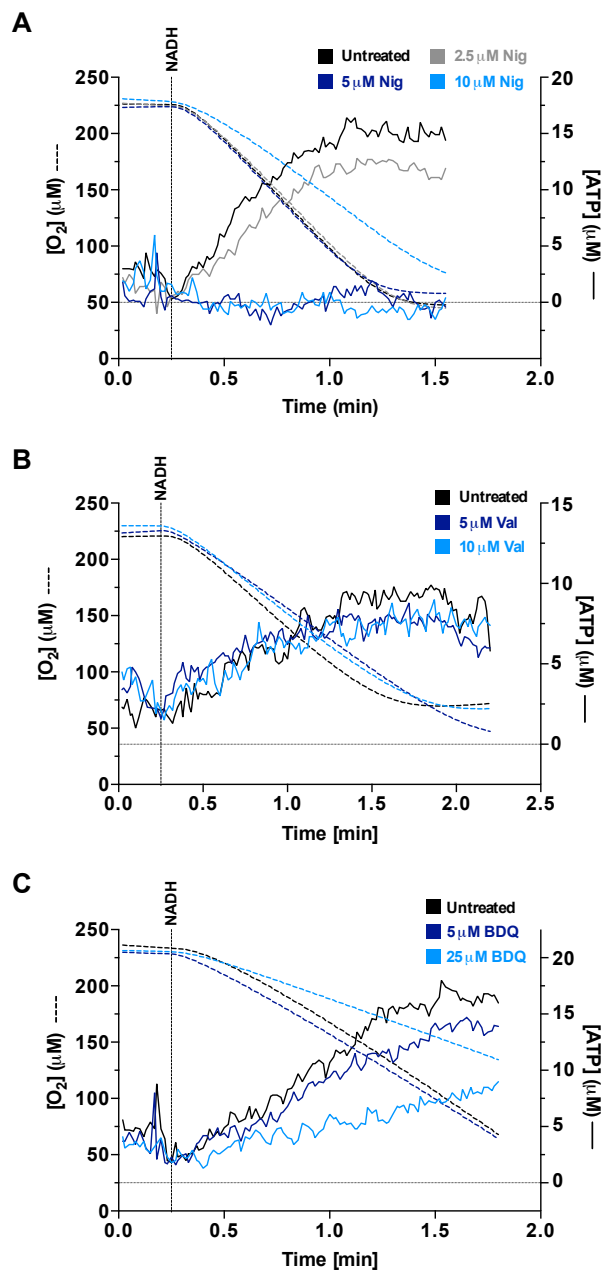

1  
2 **Fig. S4: Real-time ATP synthesis and oxygen consumption:** 0.5 mM NADH was added at the  
3 indicated time point. Each assay used  $0.125 \text{ mg mL}^{-1}$  *E. coli* MG1655 (wild-type) inverted  
4 membrane vesicles. Samples were either untreated or preincubated with A) nigericin, B)  
5 valinomycin, C) BDQ. ATP concentrations were calculated from a standard curve performed  
6 prior to the experiment, although boluses of ATP (100 nM) were routinely added at the end of  
7 each experiment to check the integrity of the calibrations.  
8

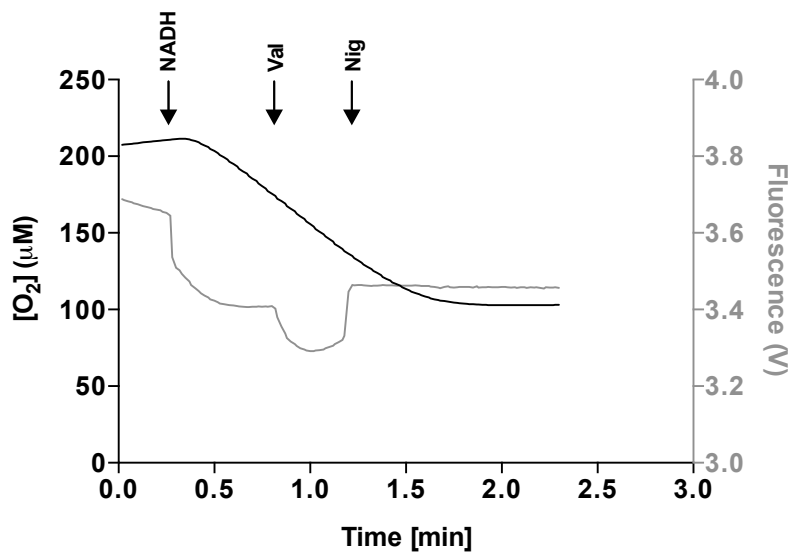

1  
 2 **Fig. S5: Simultaneous measurement of PMF generation and oxygen consumption in the**  
 3 **ATP synthesis buffer.** The experiment was performed (using the Oroboros O2k system) with  
 4 the ATP synthesis buffer except that luciferase, luciferin and Ap5a were omitted. Acridine  
 5 orange (5 µM) was added to the buffer and the fluorescent attachments were fitted with the  
 6 safranine filter for the LED and the magnesium green filter for the photodiode (gain: 100,  
 7 intensity: 700). Reduced quenching is due to the stronger buffering capacity of the ATP  
 8 synthesis buffer. NADH (0.5 mM), 10 µM valinomycin or 10 µM nigericin were added at the  
 9 indicated time points. Experiment is representative of a technical triplicate.  
 10

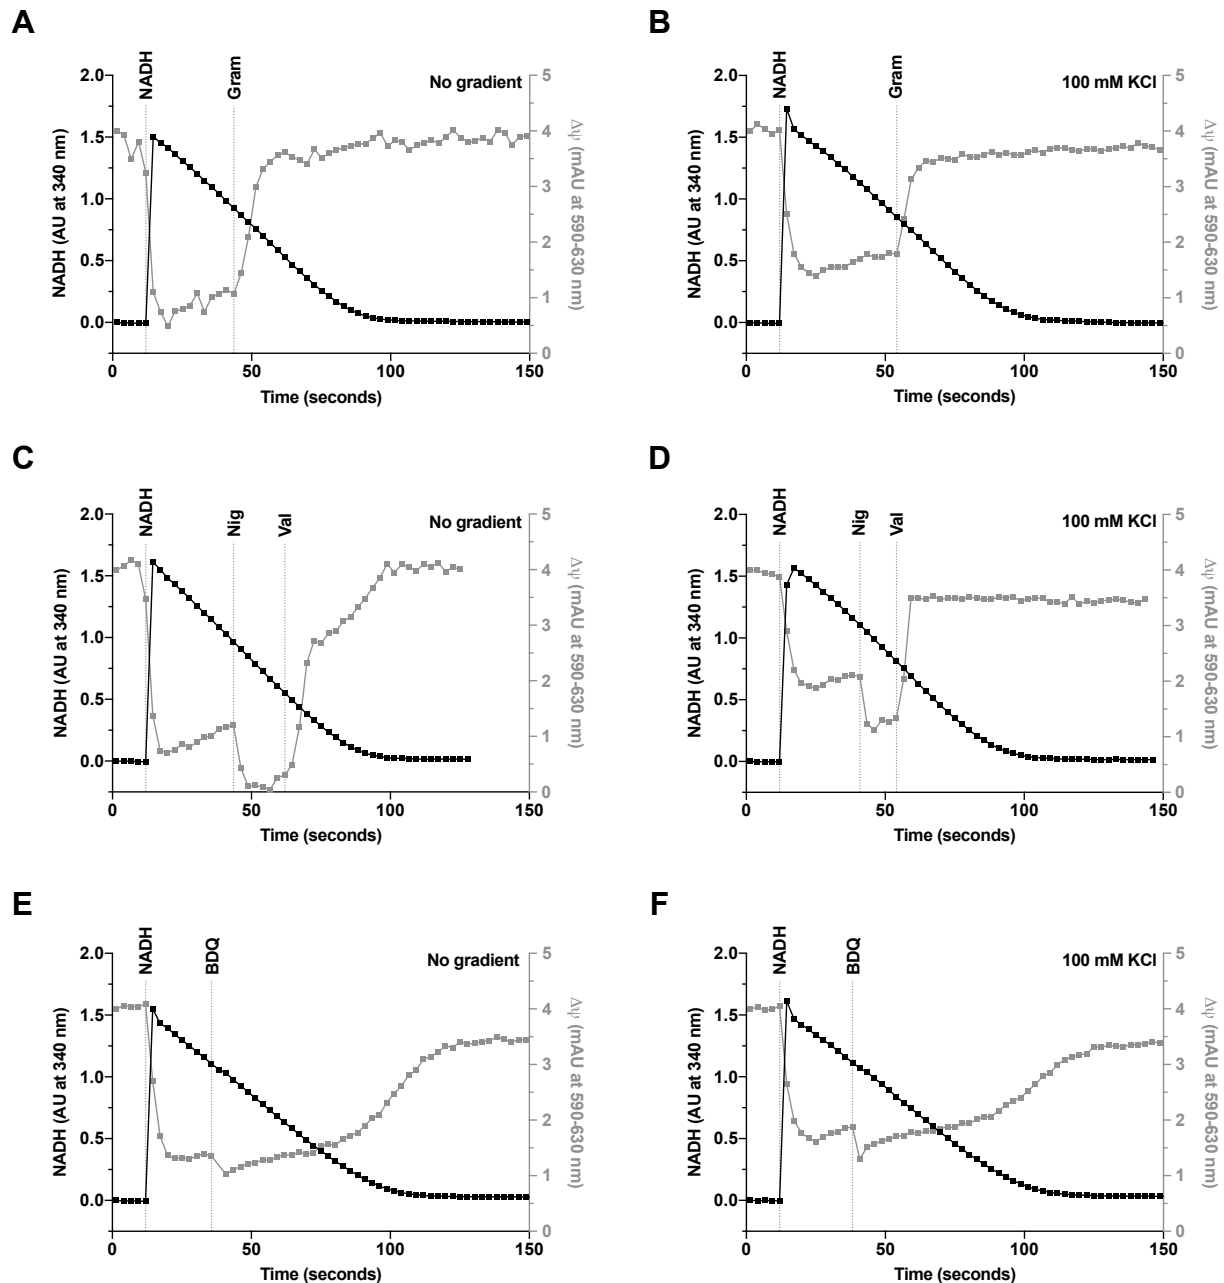

1  
 2 **Fig. S6: Effect of uncouplers and BDQ on the membrane potential generation and NADH**  
 3 **consumption.** Experiment was performed as described in the supplementary materials and  
 4 methods on *E. coli* MG1655 IMVs. In either empty (A, C, E) or KCl-containing (B, D, F) IMVs,  
 5 0.5 mM NADH was added at the indicated time points. Subsequently, either 2  $\mu$ M gramicidin  
 6 (A, B), 2  $\mu$ M nigericin then 2  $\mu$ M valinomycin (C, D) or 5  $\mu$ M BDQ were added. Experiment is  
 7 representative of a technical triplicate.

8  
 9

1

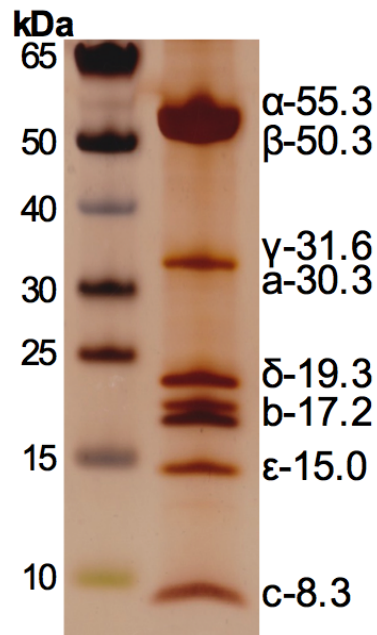

2

3 **Fig S7: As-purified *E. coli* F<sub>1</sub>F<sub>0</sub>-ATP synthase.**

4 Silver-stained 4-12% gradient SDS-PAGE of purified *E. coli* F<sub>1</sub>F<sub>0</sub>-ATP synthase (5  $\mu$ g) in  
5 protein-detergent complex. The *a* subunit was visible on overloaded gels (>30  $\mu$ g per lane, not  
6 shown).

7



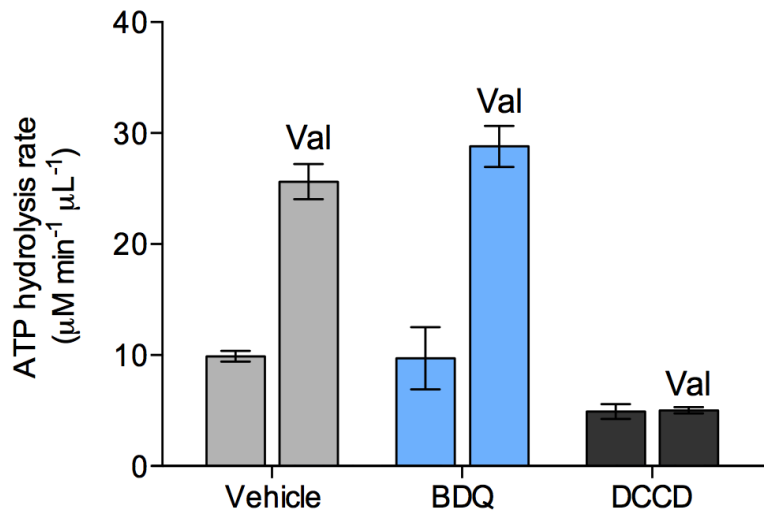

1  
2  
3  
4  
5  
6  
7  
8  
9

**Fig S8: Effects of BDQ on ATP hydrolysis in  $F_1F_0$ -proteoliposomes.**

Proteoliposomes of *E. coli*  $F_1F_0$  were prepared and measured for inhibition of ATP hydrolysis. BDQ was added at 7.5  $\mu\text{M}$  and DCCD was added at 50  $\mu\text{M}$  as described in the materials and methods, DMSO was used as the vehicle control. Valinomycin (Val) (10  $\mu\text{M}$ ) was added where indicated, otherwise EtOH was used as a second vehicle control. The buffer was 10 mM HEPES-KOH (pH 7.5), 5 mM  $\text{MgCl}_2$  and 100 mM KCl. The data are derived from kinetic traces. Error bars represent standard deviation from three independent experiments.

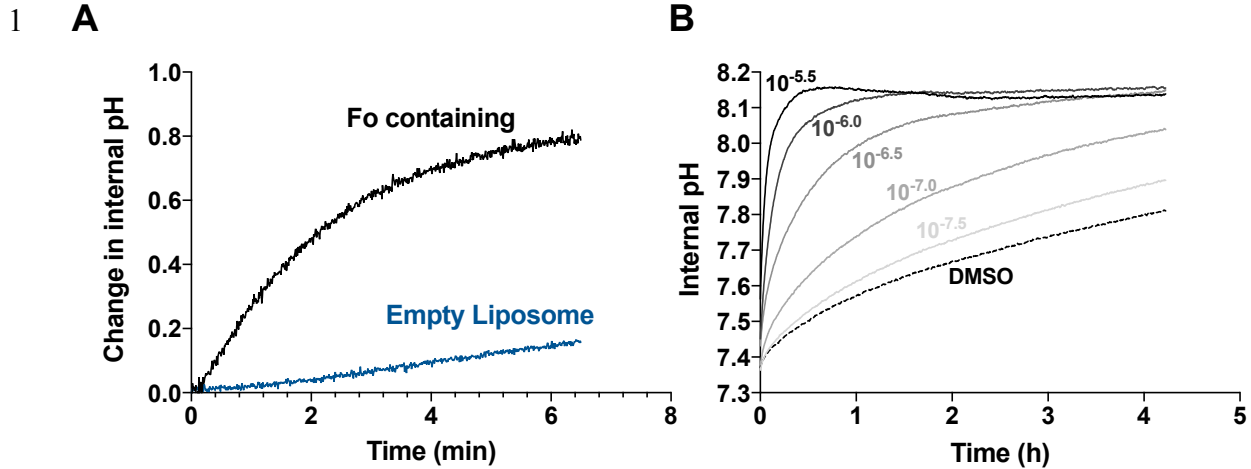

2  
 3 **Fig S9: Long term experiments in the pyranine assay.** A) Empty and  $F_o$ -containing liposomes  
 4 (50 mM  $Na_2SO_4$  inside) were diluted into buffer (50 mM  $K_2SO_4$ ), in equivalent conditions as  
 5 Fig. 4 (pH 7.1 either side), and measured for passive drift in internal pH. B) Empty liposomes  
 6 were treated with the indicated concentrations of BDQ in moles (or DMSO vehicle control) and  
 7 measured for long-term kinetics in a plate reader. The internal pH was 7.1 and the external pH  
 8 was 8.1. Wells were aspirated with a pipette before measurement.

9  
 10  
 11  
 12

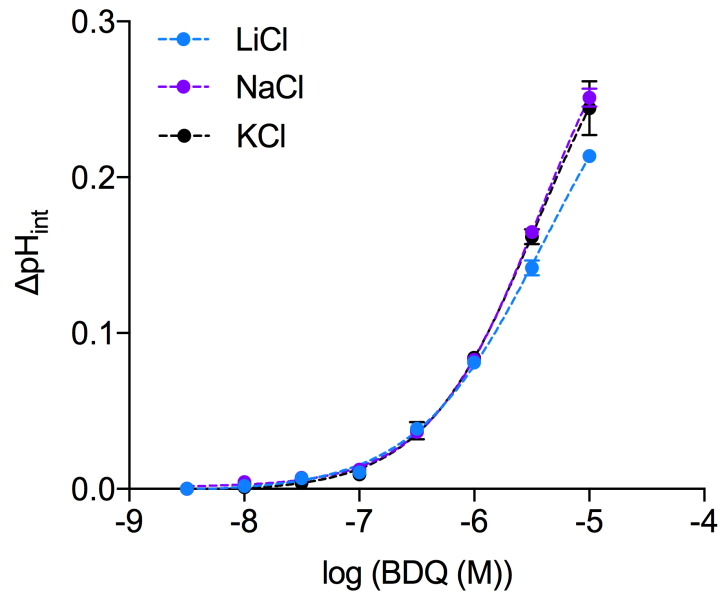

1  
2 **Fig. S10: Concentration dependence of salt-elicited proton movement by BDQ.** LiCl, NaCl  
3 and KCl were compared for their ability to elicit proton movement upon BDQ addition. No pH  
4 gradient was imposed. The  $\text{Salt}_{\text{out}}:\text{Salt}_{\text{in}}$  ratio was 10:1. Experiments used a 2 mM MES-MOPS-  
5 Tris buffer system. Error bars indicate standard deviation from triplicate measurements.  $\Delta\text{pH}_{\text{int}} =$   
6 change in internal pH.

7

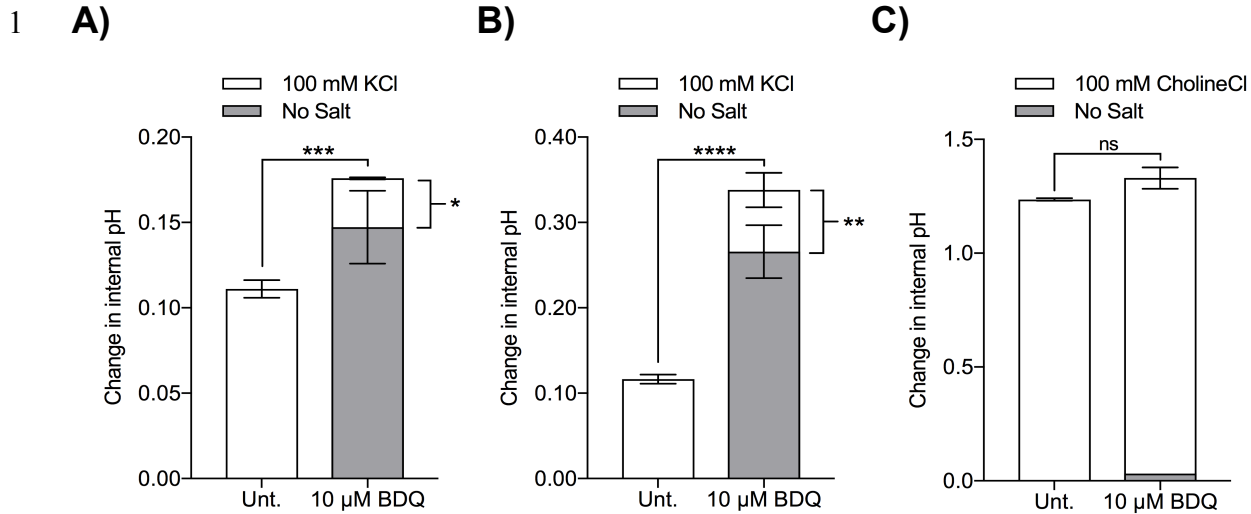

2  
3 **Fig. S11: Controls for pyranine-containing liposomes.** The ability for salt-elicited transfer of  
4 protons by BDQ, in an analogous experiment to Fig. 2D in the main text, is assessed with the  
5 following modifications as controls: A) 5 mM  $K_2HPO_4$ - $KH_2PO_4$  is used instead as a buffering  
6 system, B) liposomes were prepared with 16:0-18:1 1-palmitoyl-2-oleoyl-*sn*-glycero-3-  
7 phosphocholine (POPC) instead of soybean phosphatidylcholine, C) Choline chloride was used  
8 as the salt. For white bars a 10:1  $[Salt]_{out}:[Salt]_{in}$  gradient is established, otherwise no gradient is  
9 established (grey bars). The data are calculated relative to untreated liposomes with no salt  
10 gradient. Error bars represent standard deviation from a technical triplicate. \* =  $p < 0.05$ , \*\* =  $p$   
11  $< 0.005$ , \*\*\*  $p < 0.0005$ , \*\*\*\* =  $p < 0.0001$  (2-way ANOVA, Tukey's multiple comparisons  
12 test).

13  
14

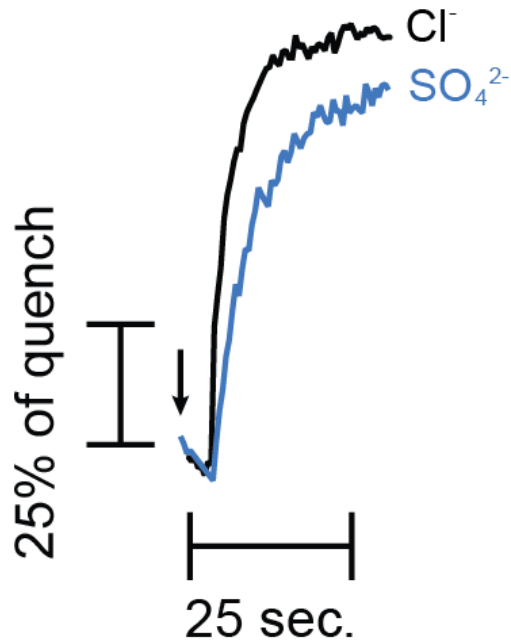

1  
2 **Fig. S12: Comparison of the effect of sodium anions in the cytochrome *bo*<sub>3</sub> system.** The  
3 ability of BDQ to release a cytochrome *bo*<sub>3</sub>-generated PMF, monitored by ACMA quenching, is  
4 compared when either 100 mM NaCl or Na<sub>2</sub>SO<sub>4</sub> present both in the buffer and liposome interior.  
5 Valinomycin was not present in these experiments. BDQ (22 μM) was added at the indicated  
6 time point. Experiment is representative of triplicate experiments. Experiments used a 20 mM  
7 MOPS (pH 7.4) buffering system.  
8

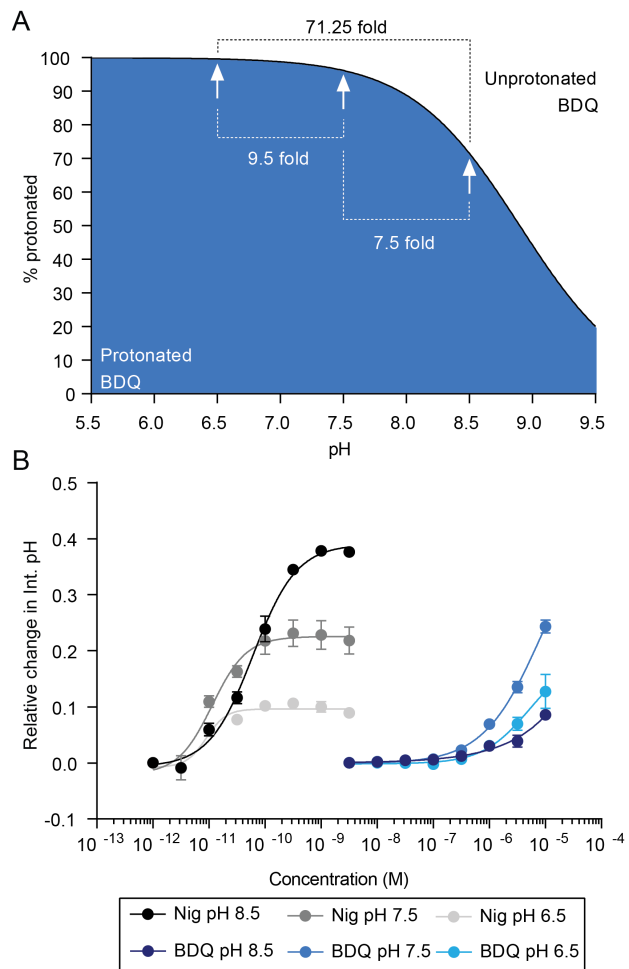

1  
 2 **Fig. S13: Ionization-state dependency of potassium-elicited  $H^+$  transfer.** (A) The ionization  
 3 state of BDQ at varying pH values, as calculated according to a  $pK_a$  of 8.9 (10). (B) The  
 4 concentration dependency of pH movement driven by a starting KCl gradient of 10:1  
 5  $[salt]_{out}:[salt]_{in}$  and initiated by the indicated compound. Assay was performed as a 30-minute  
 6 end-point experiment. Error bars represent standard deviation from triplicate experiments.

7  
 8

## 1 Supplementary References

- 2
- 3 1. Ferguson SA, Cook GM, Montgomery MG, Leslie AGW, Walker JE (2016) Regulation of the  
4 thermoalkaliphilic F(1)-ATPase from *Caldalkalibacillus thermarum*. *Proc Natl Acad Sci U S A*  
5 113(39):10860–10865.  
6
- 7 2. Iwamoto A, et al. (1991) Mutations in Ser174 and the glycine-rich sequence (Gly149, Gly150, and  
8 Thr156) in the beta subunit of *Escherichia coli* H<sup>+</sup>-ATPase. *J Biol Chem* 266(25):16350–16355.  
9
- 10 3. Moriyama Y, Iwamoto A, Hanada H, Maeda M, Futai M (1991) One-step purification of  
11 *Escherichia coli* H<sup>+</sup>-ATPase (F<sub>0</sub>F<sub>1</sub>) and its reconstitution into liposomes with neurotransmitter  
12 transporters. *J Biol Chem* 266:22141–22146.  
13
- 14 4. García JJ, Ogilvie I, Robinson BH, Capaldi RA (2000) Structure, Functioning, and Assembly of  
15 the ATP Synthase in Cells from Patients with the T8993G Mitochondrial DNA Mutation:  
16 Comparison with the enzyme in Rho0 cells completely lacking mtDNA. *J Biol Chem*  
17 275(15):11075–11081.  
18
- 19 5. Suzuki T, Ozaki Y, Sone N, Feniouk BA, Yoshida M (2007) The product of *uncI* gene in  
20 F(1)F(o)-ATP synthase operon plays a chaperone-like role to assist c-ring assembly. *Proc Natl*  
21 *Acad Sci U S A* 104(52):20776–20781.  
22
- 23 6. Wiedenmann A, Dimroth P, von Ballmoos C (2008) Δpsi and ΔpH are equivalent driving forces  
24 for proton transport through isolated F<sub>0</sub> complexes of ATP synthases. *Biochim Biophys Acta*  
25 1777(10):1301–10.  
26
- 27 7. Rumbley JN, Furlong Nickels E, Gennis RB (1997) One-step purification of histidine-tagged  
28 cytochrome bo<sub>3</sub> from *Escherichia coli* and demonstration that associated quinone is not required  
29 for the structural integrity of the oxidase. *Biochim Biophys Acta - Protein Struct Mol Enzymol*  
30 1340(1):131–142.  
31
- 32 8. Laemmli UK (1970) Cleavage of structural proteins during the assembly of the head of  
33 bacteriophage T4. *Nature* 227(5259):680–685.

1

2 9. Nesterenko M V, Tilley M, Upton SJ (1994) A simple modification of Blum's silver stain method  
3 allows for 30 minute detection of proteins in polyacrylamide gels. *J Biochem Biophys Methods*  
4 28(3):239–242.

5

6 10. Feng X, et al. (2015) Antiinfectives targeting enzymes and the proton motive force. *Proc Natl*  
7 *Acad Sci* 112 (51 ):E7073–E7082.

8
